# Supplementary material for: Resilience and Trauma among Patients with Parkinson’s Disease during the COVID-19 Pandemic
Source: PubMed Central journal article supplement — J Mov Disord. 2021 Apr 26;15(1):77–9. doi: 10.14802/jmd.20126 (PMC8820881; doi:10.14802/jmd.20126), 2021-04-26
Supplement: jmd-20126-suppl2.pdf [file jmd-20126-suppl2.pdf]

**Supplementary Table 1.** Demographic and clinical comparisons between patients stratified according to the median Brief Resilience Scale (BRS) score (i.e., BRS  $\leq$  2.3 vs. BRS  $>$  2.3)

|                                                   | Patients with BRS $\leq$ 2.3 ( <i>n</i> = 25) | Patients with BRS $>$ 2.3 ( <i>n</i> = 25) | <i>p</i> |
|---------------------------------------------------|-----------------------------------------------|--------------------------------------------|----------|
| Age (years)                                       | 73.96 $\pm$ 8.66                              | 70.00 $\pm$ 8.436                          | 0.109    |
| Sex (M/F)                                         | 15/10                                         | 20/5                                       | 0.067    |
| Age at onset (years)                              | 67.41 $\pm$ 8.62                              | 63.47 $\pm$ 7.02                           | 0.081    |
| Disease duration (years)                          | 6.55 $\pm$ 3.81                               | 6.52 $\pm$ 4.17                            | 0.976    |
| MDS-UPDRS 3                                       | 25.48 $\pm$ 12.83                             | 27.73 $\pm$ 11.61                          | 0.521    |
| HY stage                                          | 2.20 $\pm$ 0.71                               | 2.17 $\pm$ 0.46                            | 0.864    |
| Consultation delay due to service shutdown (days) | 98.71 $\pm$ 59.58                             | 88.60 $\pm$ 57.59                          | 0.547    |
| COVID-19 related worries                          | 7.44 $\pm$ 1.52                               | 5.91 $\pm$ 2.82                            | 0.018    |
| COVID-19 related worries about health status      | 8.04 $\pm$ 1.51                               | 6.56 $\pm$ 2.98                            | 0.028    |
| TSQ                                               | 2.70 $\pm$ 1.83                               | 1.13 $\pm$ 0.96                            | 0.001    |
| EQ-5D                                             | 3.18 $\pm$ 2.20                               | 1.52 $\pm$ 1.73                            | 0.005    |
| EQ-VAS                                            | 58.70 $\pm$ 17.89                             | 70.86 $\pm$ 12.49                          | 0.008    |

Values are expressed as mean  $\pm$  standard deviation, unless otherwise specified. \**p* < 0.05. BRS: Brief Resilience Scale, EQ-5D: EuroQoL-5 dimensions, EQ-VAS: EuroQoL-visual analogue scale, M: male, F: female, UPDRS: Unified Parkinson's Disease Rating Scale, HY: Hoehn and Yahr, TSQ: Trauma Screening Questionnaire.
